# Supplementary material
Source: PubMed Central journal article supplement (PMC7306001)
Supplement: NIHMS1590249-supplement-2.pdf [file NIHMS1590249-supplement-2.pdf]

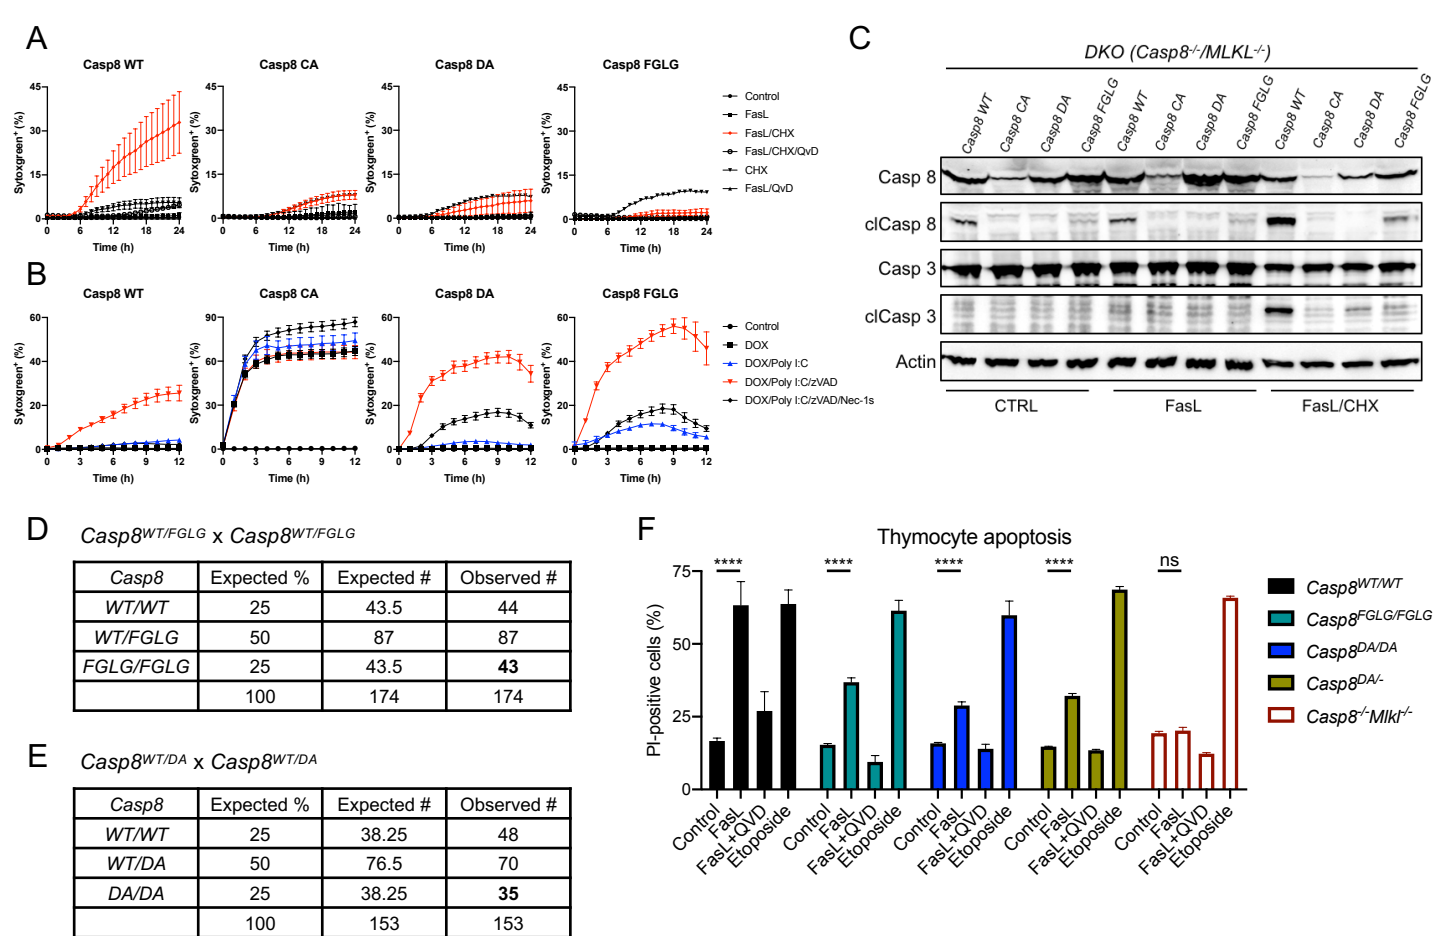

**Figure S1: *Casp8*<sup>FGLG/FGLG</sup> and *Casp8*<sup>DA/DA</sup> MEFs are resistant to apoptosis and retain the ability to block necroptosis, Related to Figure 1.**

**A:** *Casp8*<sup>-/-/MLK1<sup>-/-</sup></sup> MEFs expressing caspase-8 WT, C362A, D387A or F122GL123G were stimulated as indicated. Cell death was monitored by SYTOX Green uptake using an Incucyte Kinetic Live Cell Imager. **B:** *Casp8*<sup>-/-/MLK1<sup>-/-</sup></sup> MEFs expressing doxycycline (DOX)-inducible MLKL and Caspase-8 WT, C362A, D387A or F122GL123G were stimulated as indicated. Cell death was monitored by SYTOX Green uptake using an Incucyte Kinetic Live Cell Imager. **C:** Western blots for Caspase-8, cleaved Caspase-8, Caspase-3, cleaved Caspase-3 and  $\beta$ -Actin in cell lysates of *Casp8*<sup>-/-/MLK1<sup>-/-</sup></sup> MEFs expressing Caspase-8 WT, CA, DA or FGLG that were stimulated as indicated for 20 hours. **D, E:** Expected and observed frequency of genotypes in offspring from intercrosses of *Casp8*<sup>WT/FGLG</sup> (D) and *Casp8*<sup>WT/DA</sup> (E) mice. **F:** Cell death of thymocytes isolated from mice of the indicated genotypes by propidium iodide (PI) uptake as determined by flow cytometry 24 hours after indicated treatment.

\*\*\*\*  $p < 0.0001$ , ns not significant

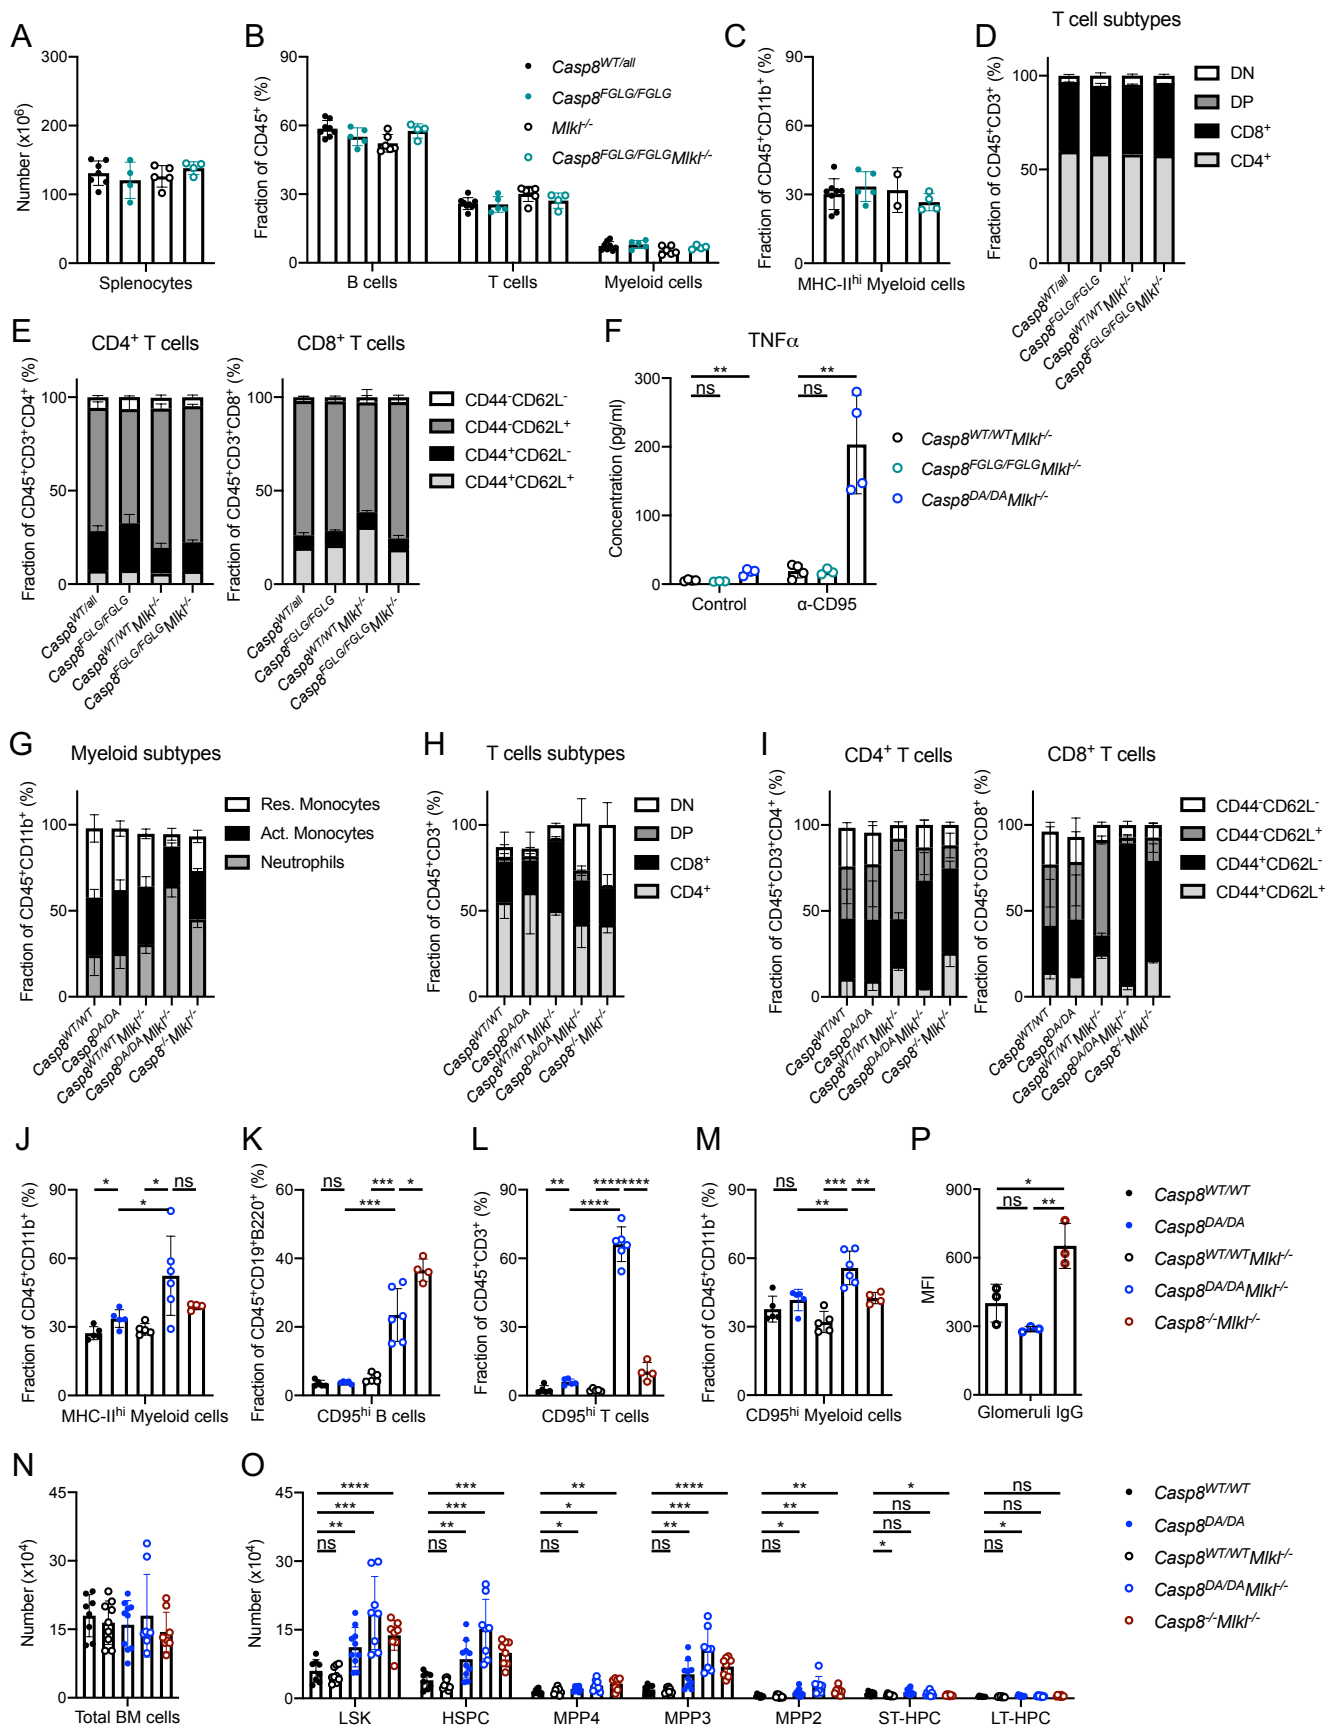

**Figure S2: Ablation of *Mikl* controls inflammation in *Casp8*<sup>DA/DA</sup>, but not *Casp8*<sup>FGLG/FGLG</sup> mice, Related to Figure 2.**

A: Total splenic cell numbers. B, C: Percentages of splenic B cells, T cells and Myeloid cells (B), and MHC-II<sup>hi</sup> Myeloid cells (C) as determined by flow cytometry. D, E: T cell subtypes (D) and CD44 and CD62L status of CD4<sup>+</sup> (left) and CD8<sup>+</sup> (right) T cells (E) as determined by flow cytometry. F: TNF $\alpha$  concentration in sera of mice 4 hours post-IP injection with 1.2 mg/kg  $\alpha$ -CD95 or PBS as measured by ELISA. G, H: Myeloid cell subtypes (G) and T cell subtypes (H) as determined by flow cytometry. I: CD44 and CD62L status of CD4<sup>+</sup> (left) and CD8<sup>+</sup> (right) T cells as determined by flow cytometry. J-M: MHC-II<sup>hi</sup> Myeloid cells (J), and CD95<sup>hi</sup> B cells (K), T cells (L) and Myeloid cells (M) as determined by flow cytometry. N: Total bone-marrow (BM) cell numbers. O: Bone-marrow stem cell subsets as determined by flow cytometry. P: IgG deposition in glomeruli as determined by IF on kidney sections.

\*\*\*\*  $p < 0.0001$ , \*\*\*  $p < 0.0005$ , \*\*  $p < 0.005$ , \*  $p < 0.05$ , ns not significant

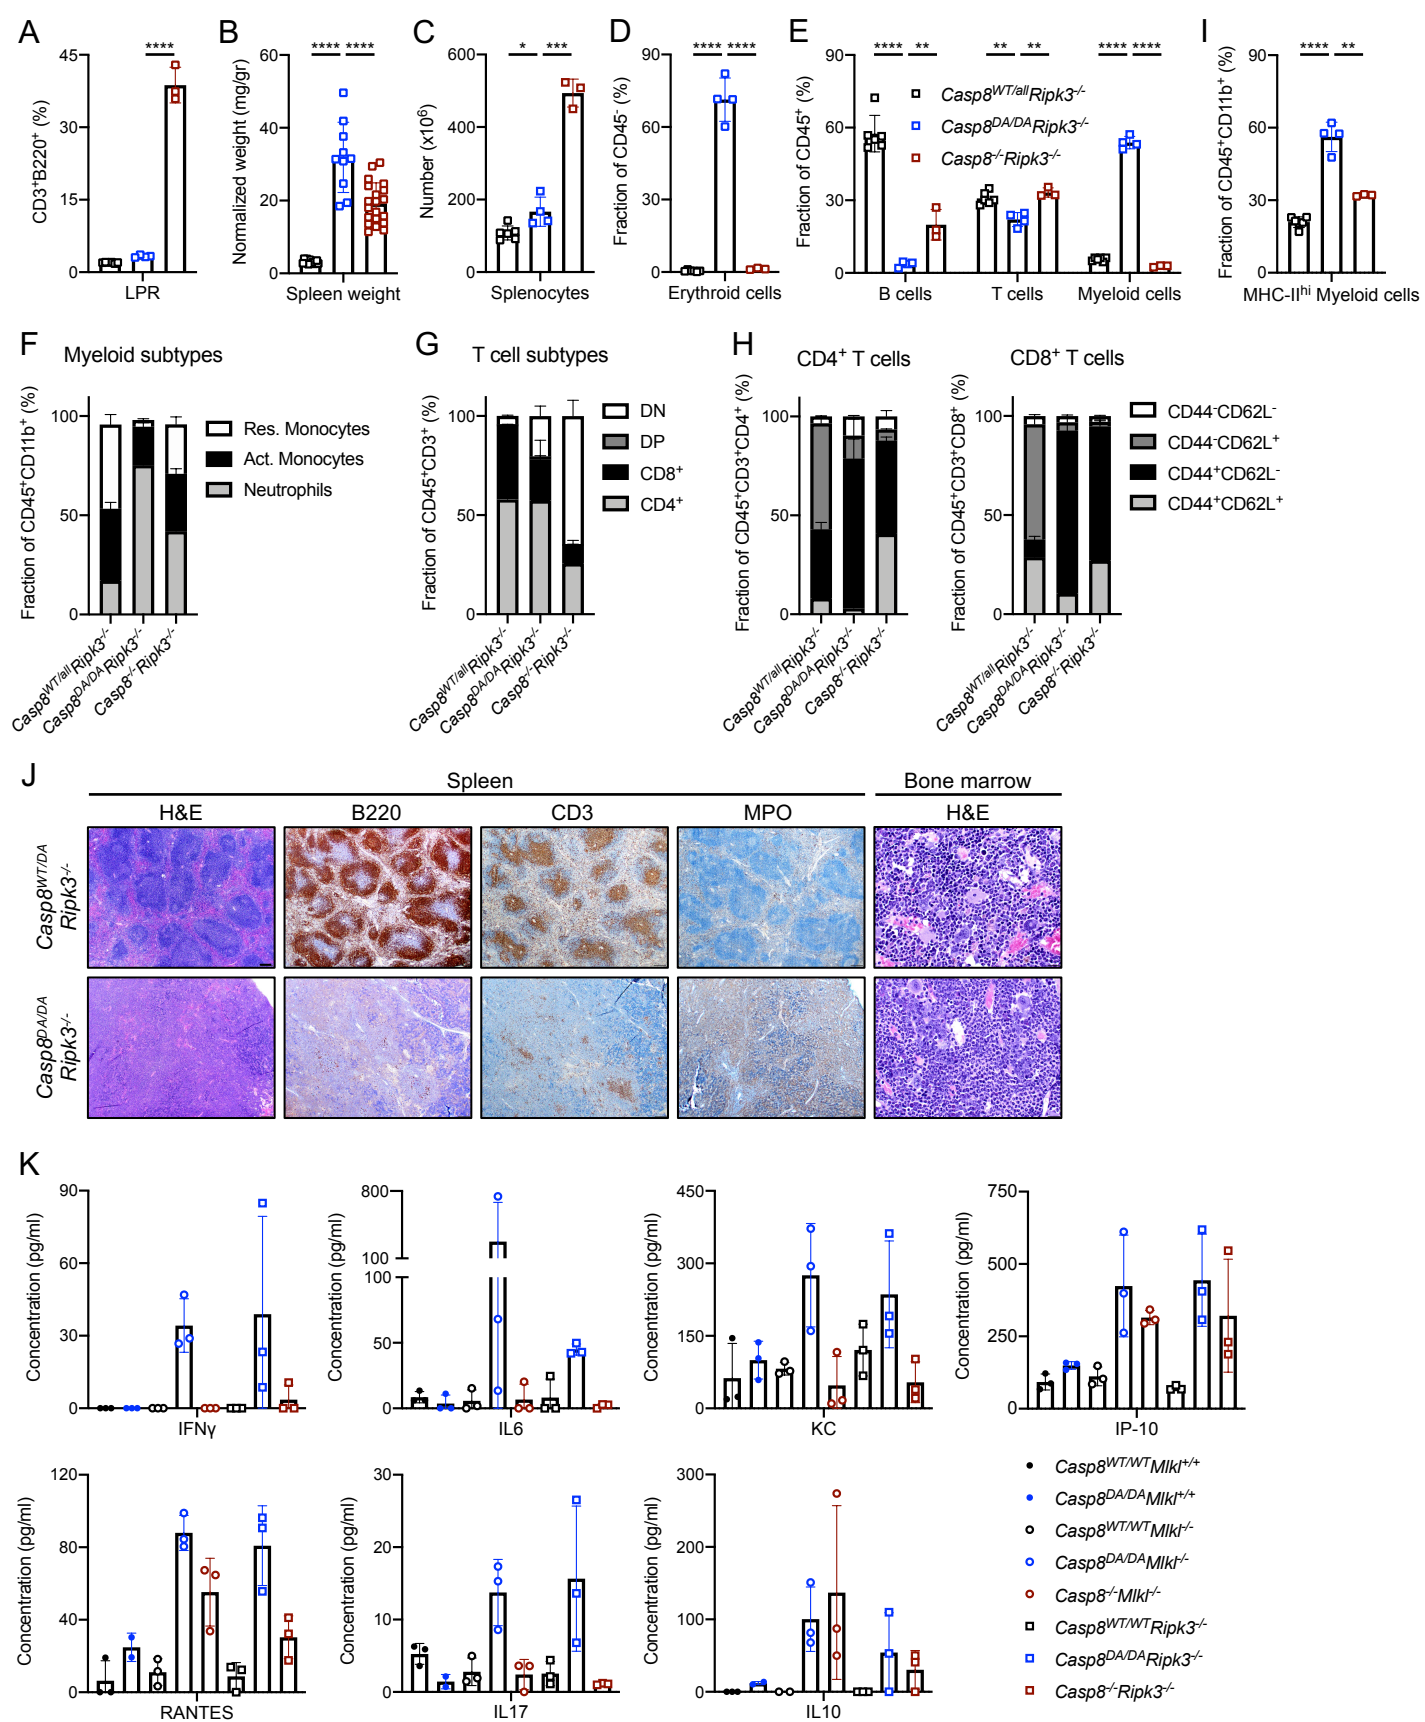

**Figure S3: Ablation of *Ripk3* controls lethal inflammation in *Casp8<sup>DA/DA</sup>* mice, Related to Figure 2.**

A: Percentages of splenic CD3<sup>+</sup>B220<sup>+</sup> cells as determined by flow cytometry. B: Normalized spleen weight. C: Total splenic cell numbers. D, E: Percentages of splenic Erythroid cells (D), B cells, T cells and Myeloid cells (E) as determined by flow cytometry. F, G: Myeloid cell subtypes (F) and T cell subtypes (G) as determined by flow cytometry. H: CD44 and CD62L status of CD4<sup>+</sup> (left) and CD8<sup>+</sup> (right) T cells as determined by flow cytometry. I: MHC-II<sup>hi</sup> Myeloid cells as determined by flow cytometry. J: Representative images of H&E of spleen (left) and bone marrow (right) and immunohistochemistry (IHC) for B220, CD3 and MPO on lung sections (middle). K: Serum levels of the indicated cytokines as measured by Multiplex ELISA.

\*\*\*\* p<0.0001, \*\*\* p<0.0005, \*\* p<0.005, \* p<0.05

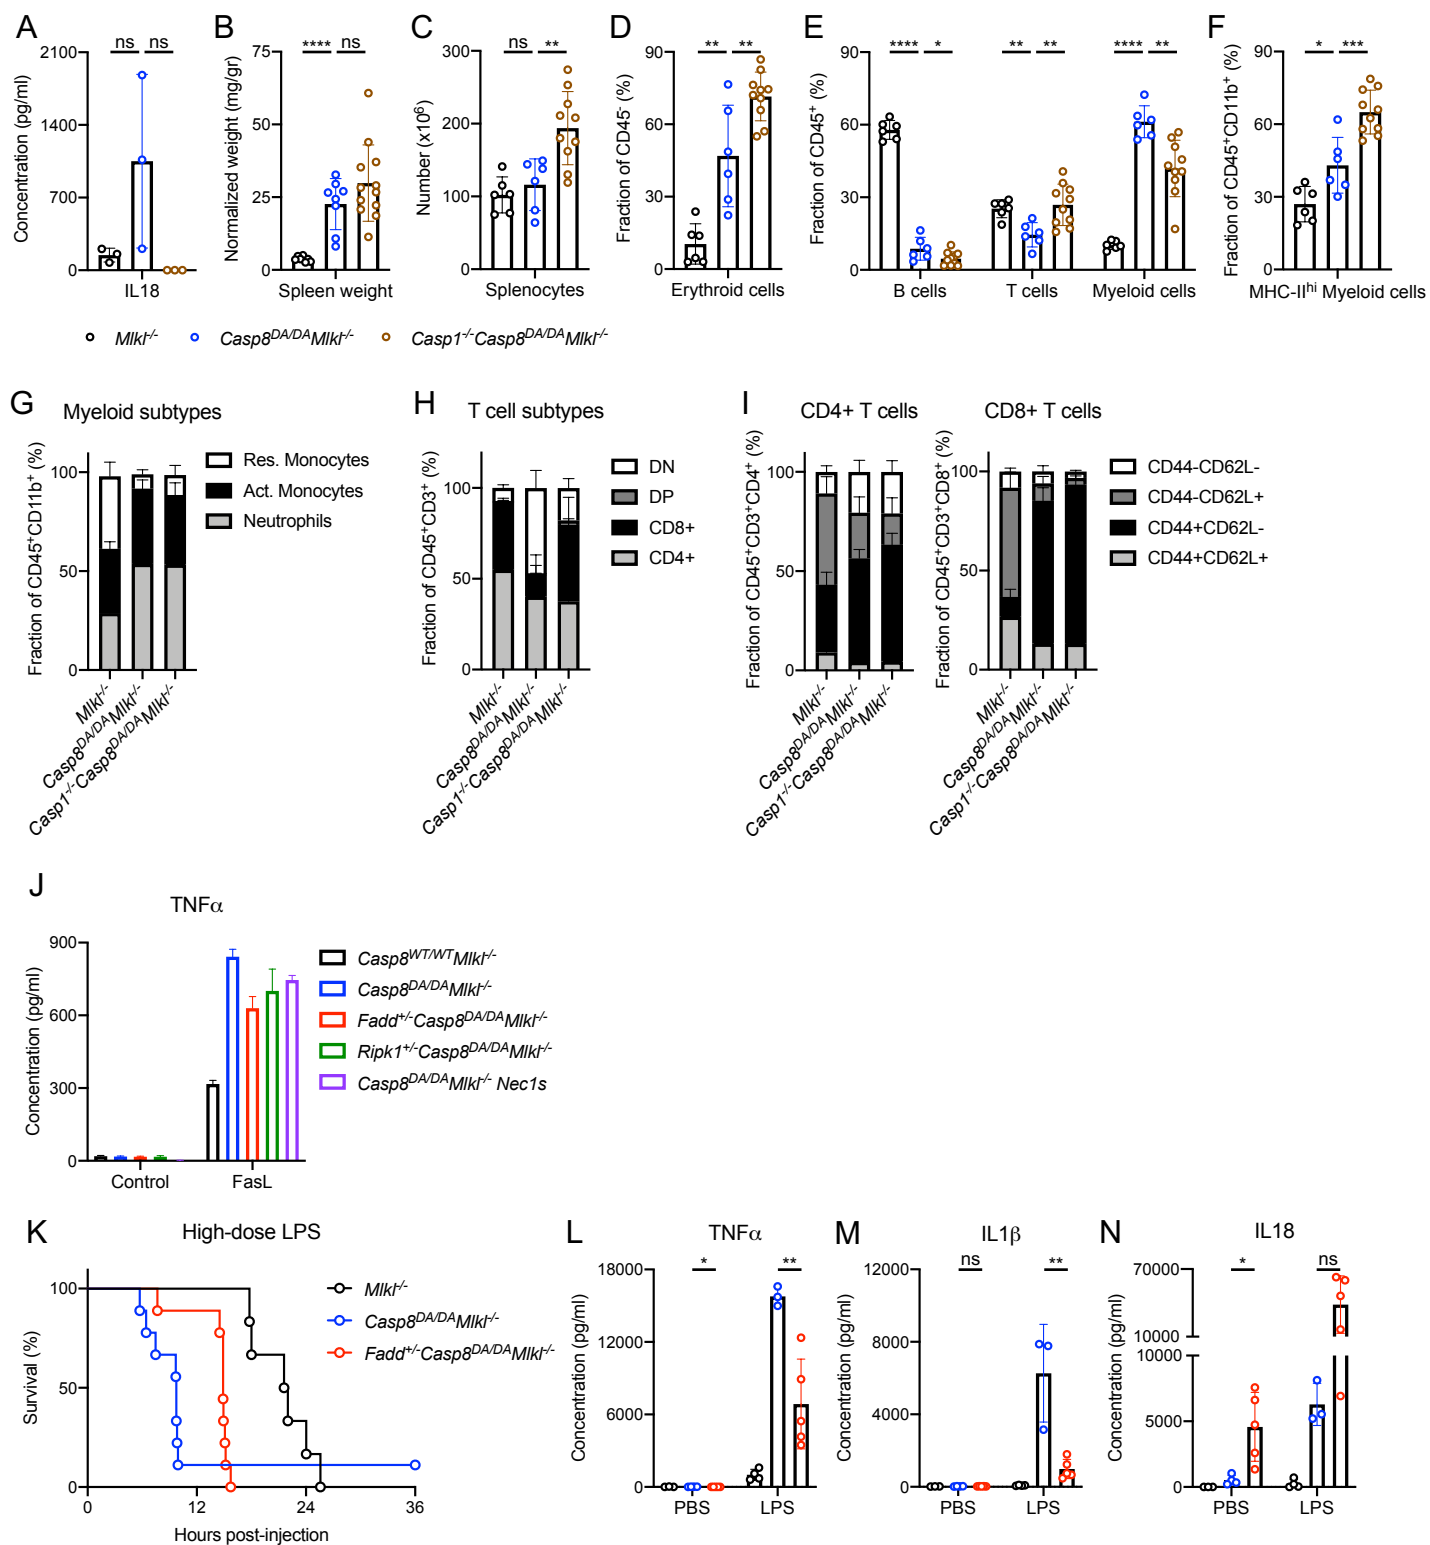

**Figure S4: The inflammatory phenotype of *Casp8*<sup>DA/DA</sup>*Mik1*<sup>-/-</sup> mice is mediated by FADD and RIPK1, but not by Caspase-1 and/or -11, Related to Figure 4.**

A: Serum cytokine concentration of IL18 as measured by ELISA. B: Normalized spleen weight. C: Total splenic cell numbers. D-F: Percentages of splenic Erythroid cells (D), B cells, T cells and Myeloid cells (E) and MHC-II<sup>hi</sup> Myeloid cells (F) as determined by flow cytometry. G, H: Myeloid cell subtypes (G) and T cell subtypes (H) as determined by flow cytometry. I: CD44 and CD62L status of CD4<sup>+</sup> (left) and CD8<sup>+</sup> (right) T cells as determined by flow cytometry. J: TNFα concentration in supernatant 24 hours post-CD95L stimulation. K: Survival of mice of the indicated genotypes after 56 mg/kg IP-injected LPS. *Mik1*<sup>-/-</sup> n=6, *Casp8*<sup>DA/DA</sup>*Mik1*<sup>-/-</sup> n=9, *Fadd*<sup>+/-</sup>*Casp8*<sup>DA/DA</sup>*Mik1*<sup>-/-</sup> n=9. L-N: Serum concentration of TNFα (L), IL1β (M), and IL18 (N) in mice 2 hours post-IP injection with 56 mg/kg LPS or PBS as measured by ELISA. BMDMs generated from mice of the indicated genotypes were pre-stimulated with LPS (20 ng/ml, overnight) and treated with CD95L.

\*\*\*\* p < 0.0001, \*\*\* p < 0.0005, \*\* p < 0.005, \* p < 0.05, ns not significant

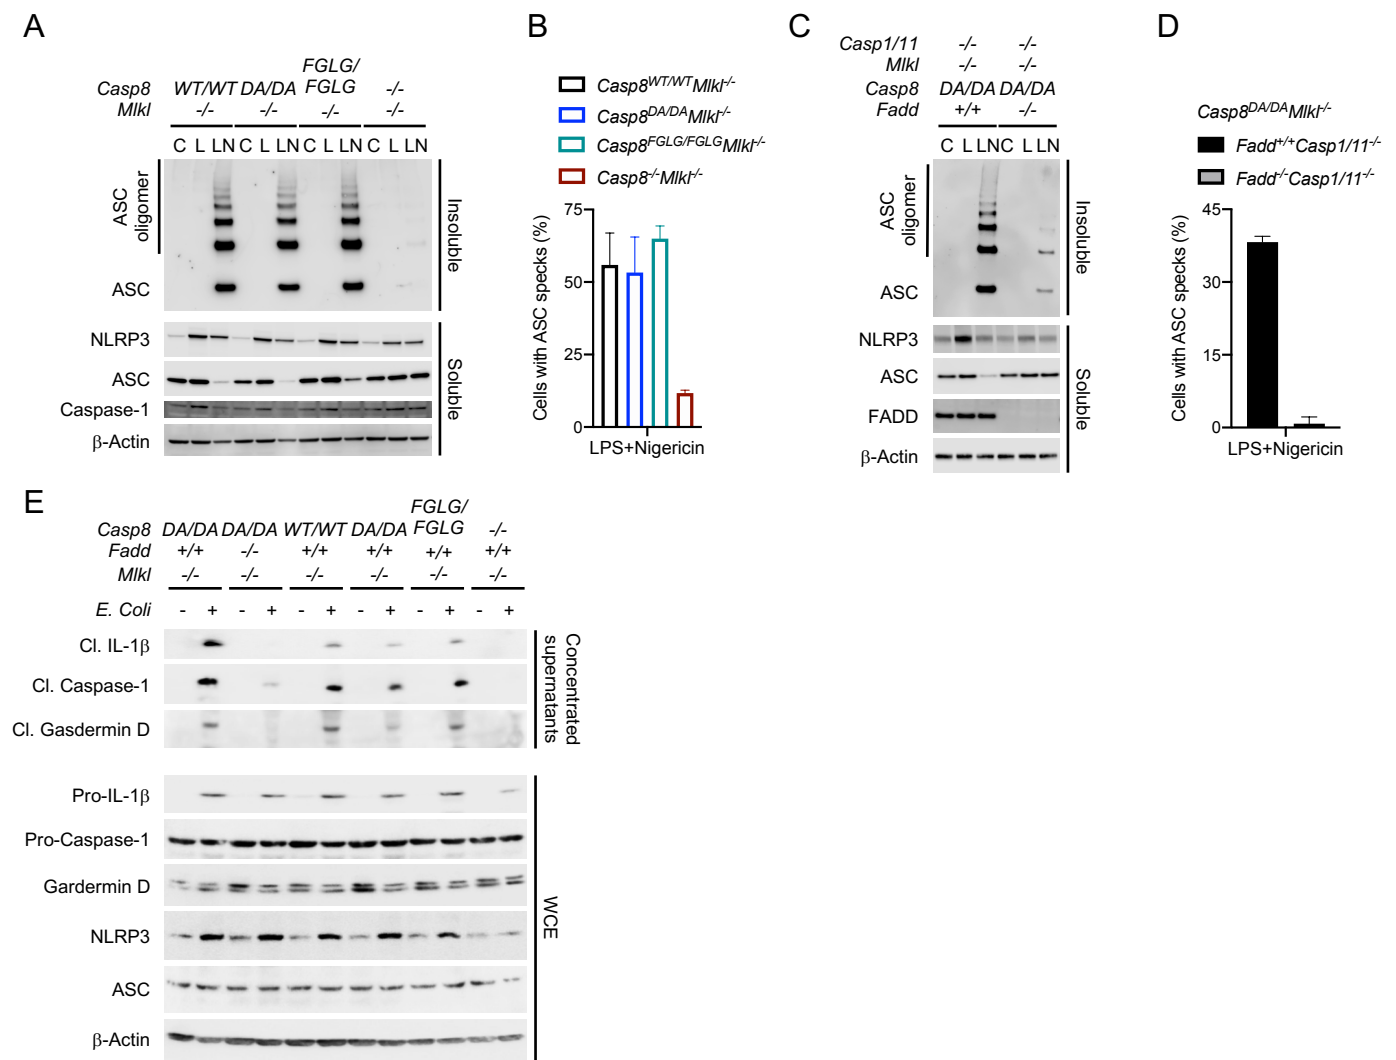

**Figure S5: Caspase-8 and FADD are required for optimal inflammasome activation in macrophages, Related to Figure 6.**

A, C: Western blots for ASC in the cross-linked insoluble fraction and ASC, NLRP3, Caspase-1 and  $\beta$ -Actin in the soluble fraction of lysates from LPS and nigericin-treated BMDMs generated from mice of the indicated genotypes. C: Control, L: LPS, LN: LPS+nigericin. B, D: ASC speck formation in LPS and nigericin-treated BMDMs generated from mice of the indicated genotypes as determined by IF. E: Western blots for cleaved (Cl.) IL1 $\beta$ , cleaved Caspase-1 and cleaved Gasdermin D in concentrated supernatants, and pro-IL1 $\beta$ , pro-Caspase-1, Gasdermin D, NLRP3, ASC and  $\beta$ -Actin in whole cell extracts (WCE) of BMDMs generated from mice of the indicated genotypes upon infection with *E. coli*.

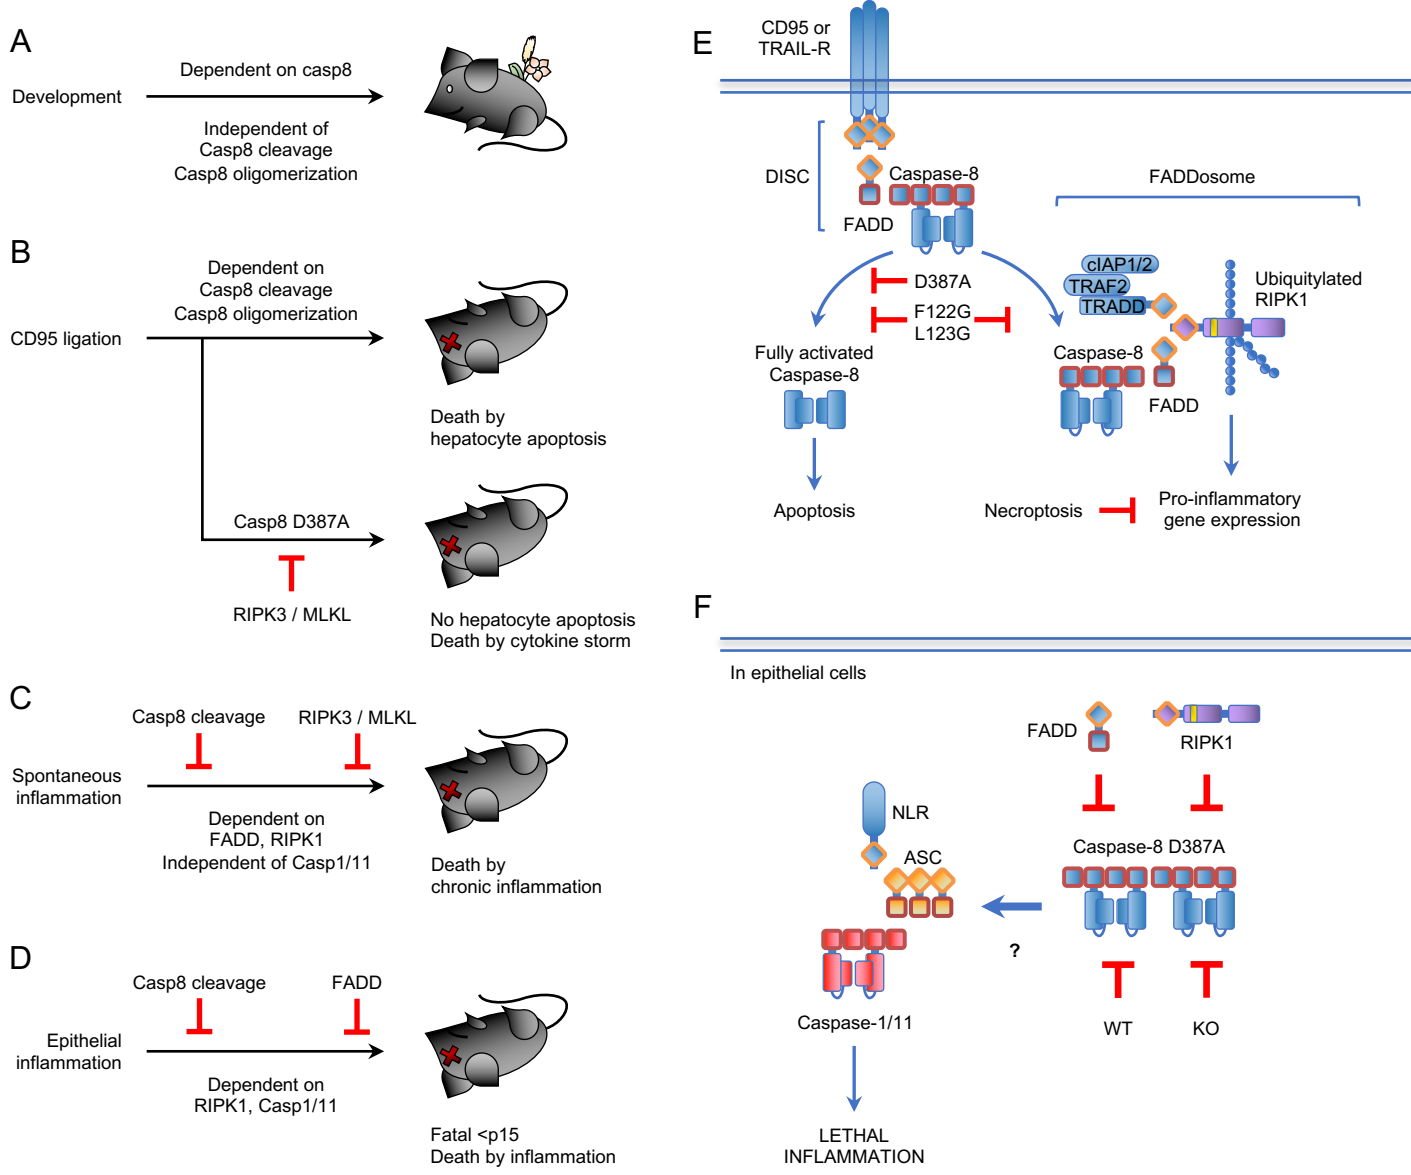

**Figure S6: Regulation of Caspase-8-mediated inflammation, Related to Figures 1-6.**

Schematic representations of the findings of this study.

A: The influence of Caspase-8 on mouse development.

B: The influence of Caspase-8 on the lethal effects of *in vivo* CD95 ligation.

C: The influence of Caspase-8 and necroptosis on spontaneous inflammation *in vivo*.

D: The influence of Caspase-8 and FADD on epithelial inflammation *in vivo*.

E: The effects of Caspase-8s D387A and F122GL123G mutations on CD95-mediated signaling.

F: The effects of Caspase-8s D387A mutation on ASC oligomerization.
